# Supplementary material for: The YTH Domain Family of N6‐Methyladenosine “Readers” in the Diagnosis and Prognosis of Colonic Adenocarcinoma
Source: Hindawi journal article supplement (doi:10.1155/2020/9502560), 2020-01-01
Supplement: f1 [file 9502560.f1.zip]

A

# Enrichment plot: KEGG\_BASAL\_TRANSCRIPTION\_FACTORS

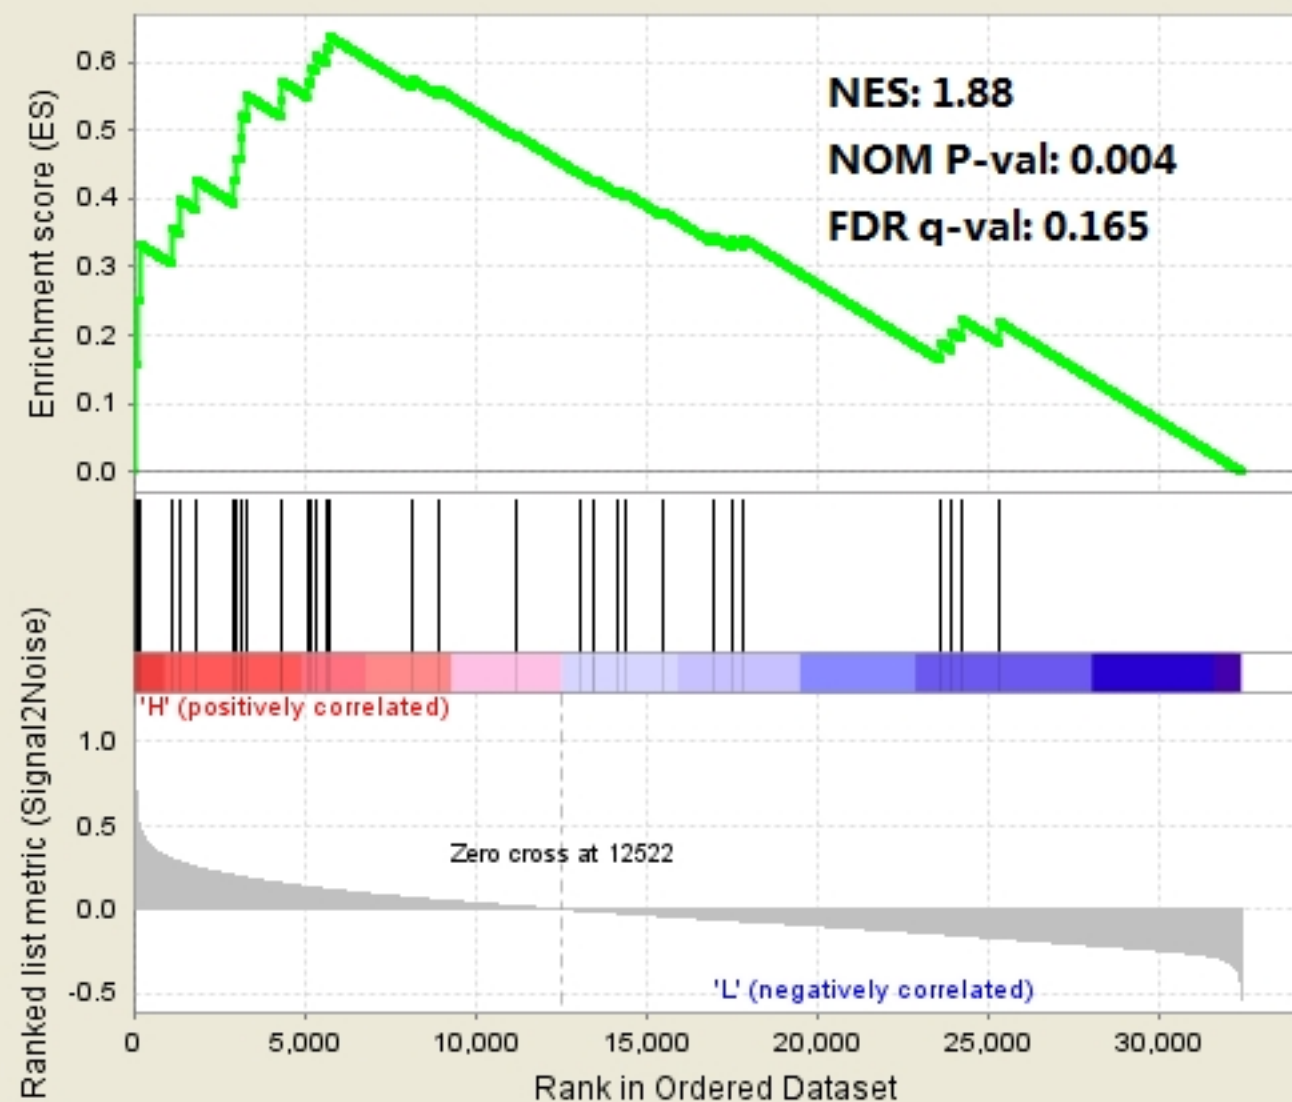

YTHDF1

Enrichment profile Hits Ranking metric scores

B

**Enrichment plot: KEGG\_SPLICEOSOME**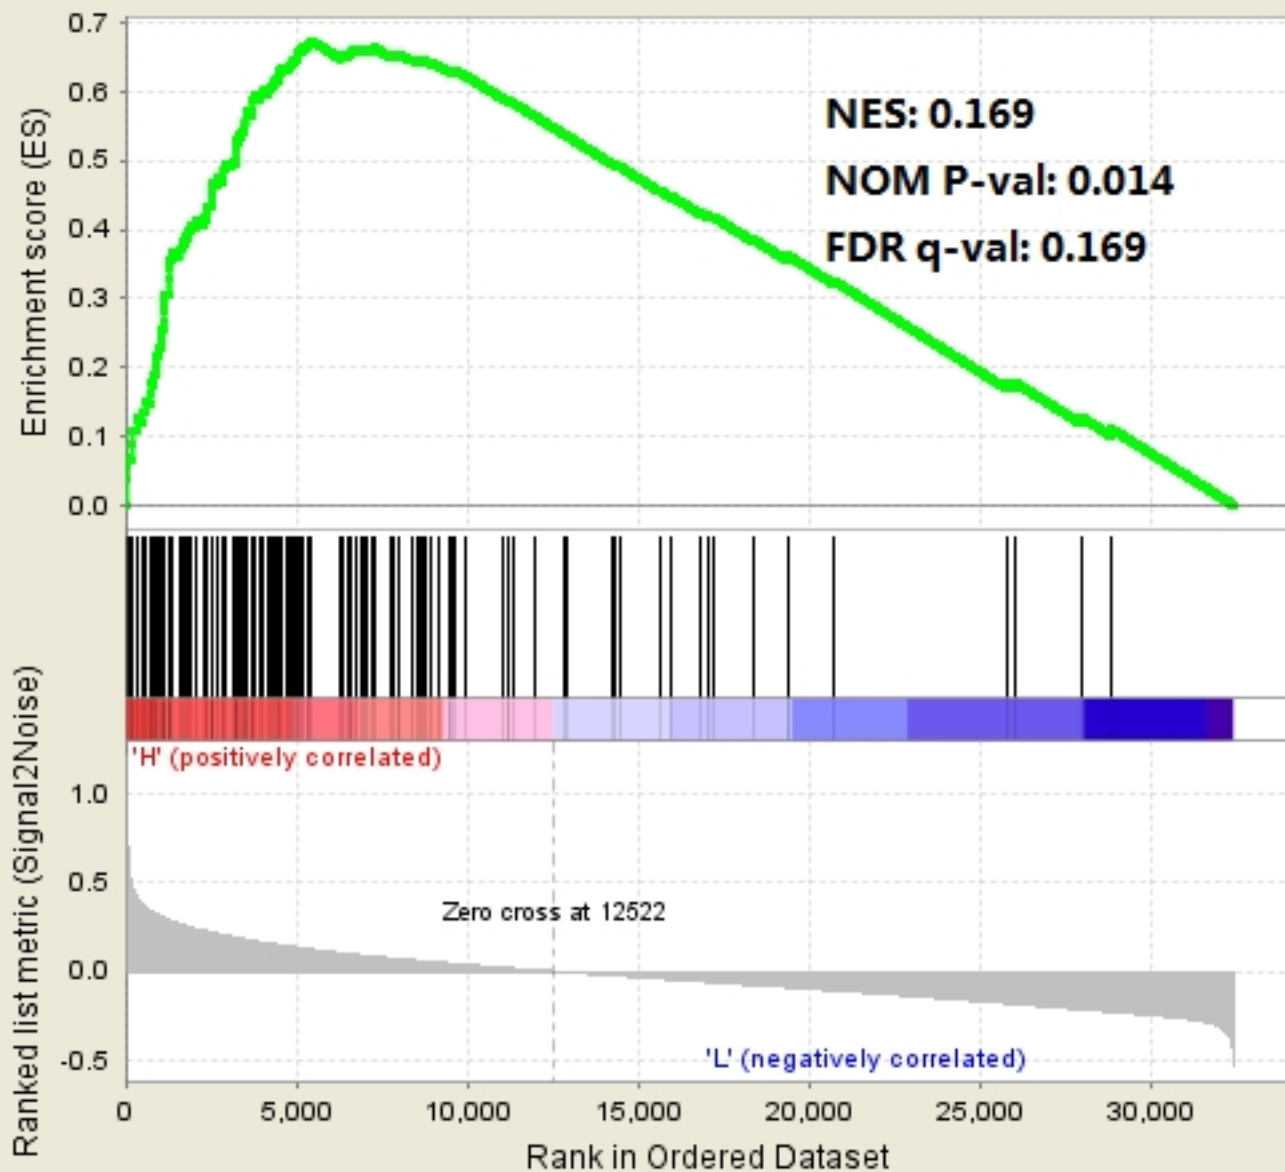**YTHDF1**

— Enrichment profile — Hits — Ranking metric scores

C

## Enrichment plot:

## KEGG\_UBIQUITIN\_MEDIATED\_PROTEOLYSIS

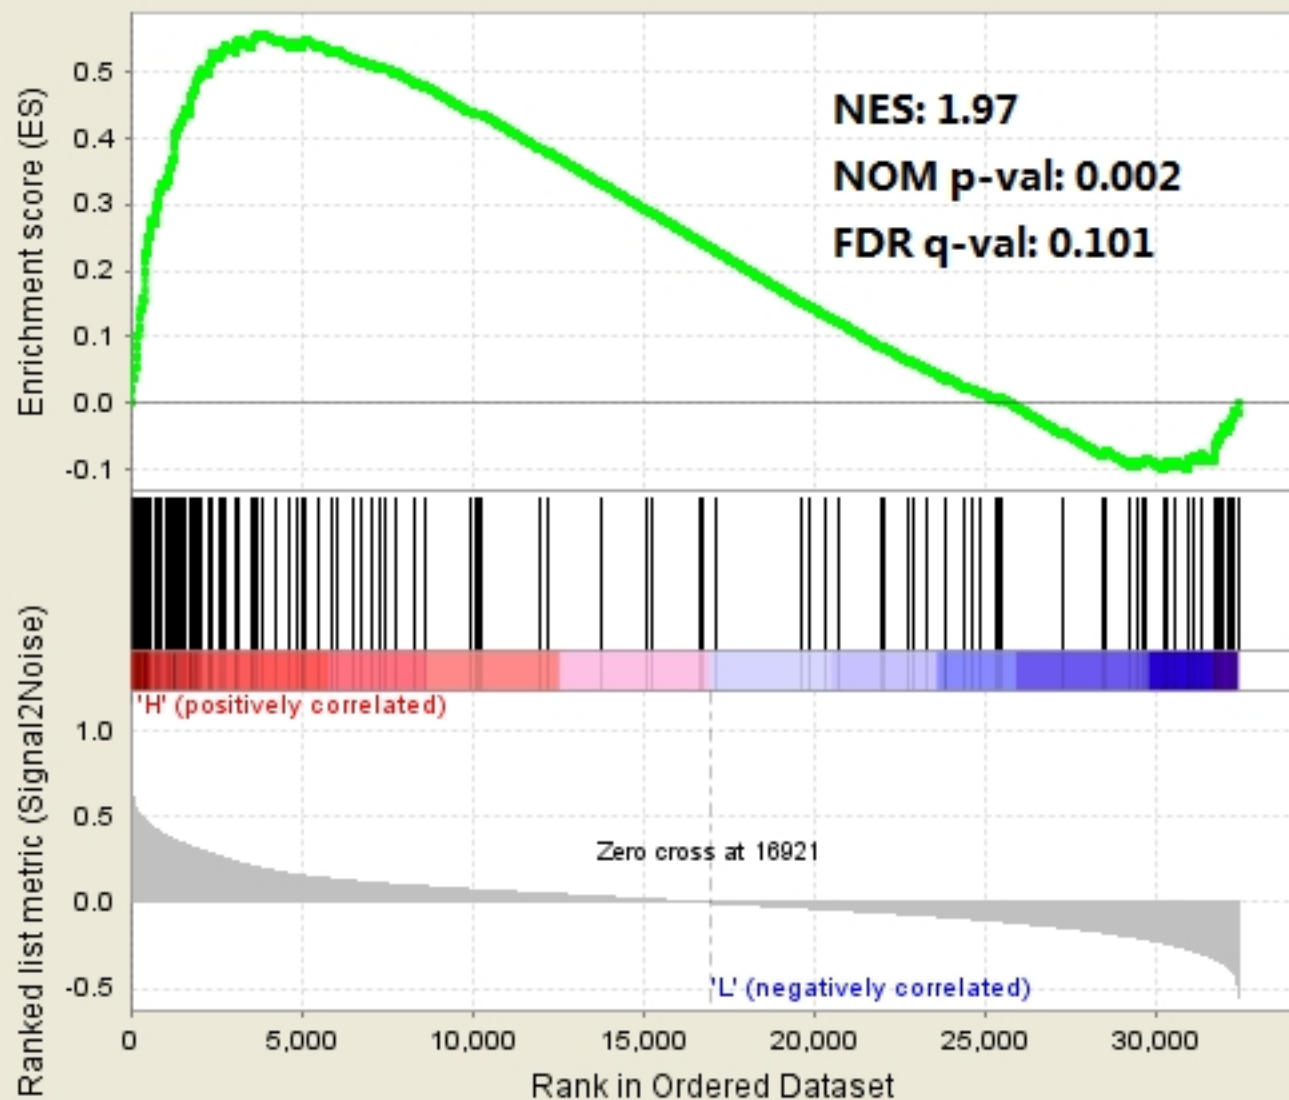

YTHDF3

— Enrichment profile — Hits — Ranking metric scores

D

# Enrichment plot: KEGG\_TGF\_BETA\_SIGNALING\_PATHWAY

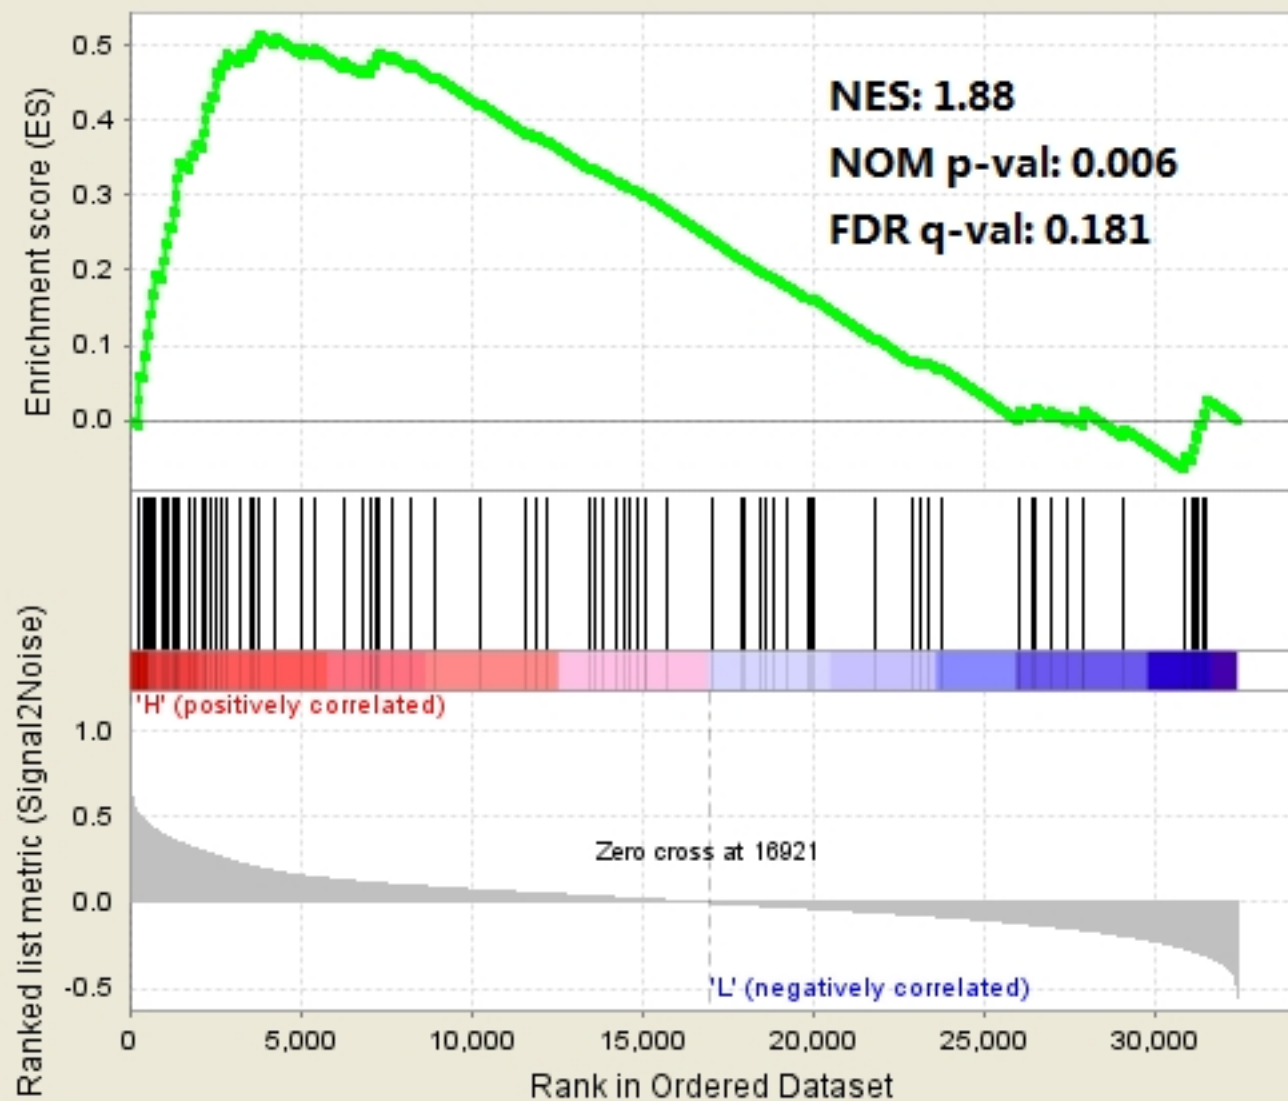

YTHDF3

— Enrichment profile — Hits — Ranking metric scores

E

## Enrichment plot:

## KEGG\_UBIQUITIN\_MEDIATED\_PROTEOLYSIS

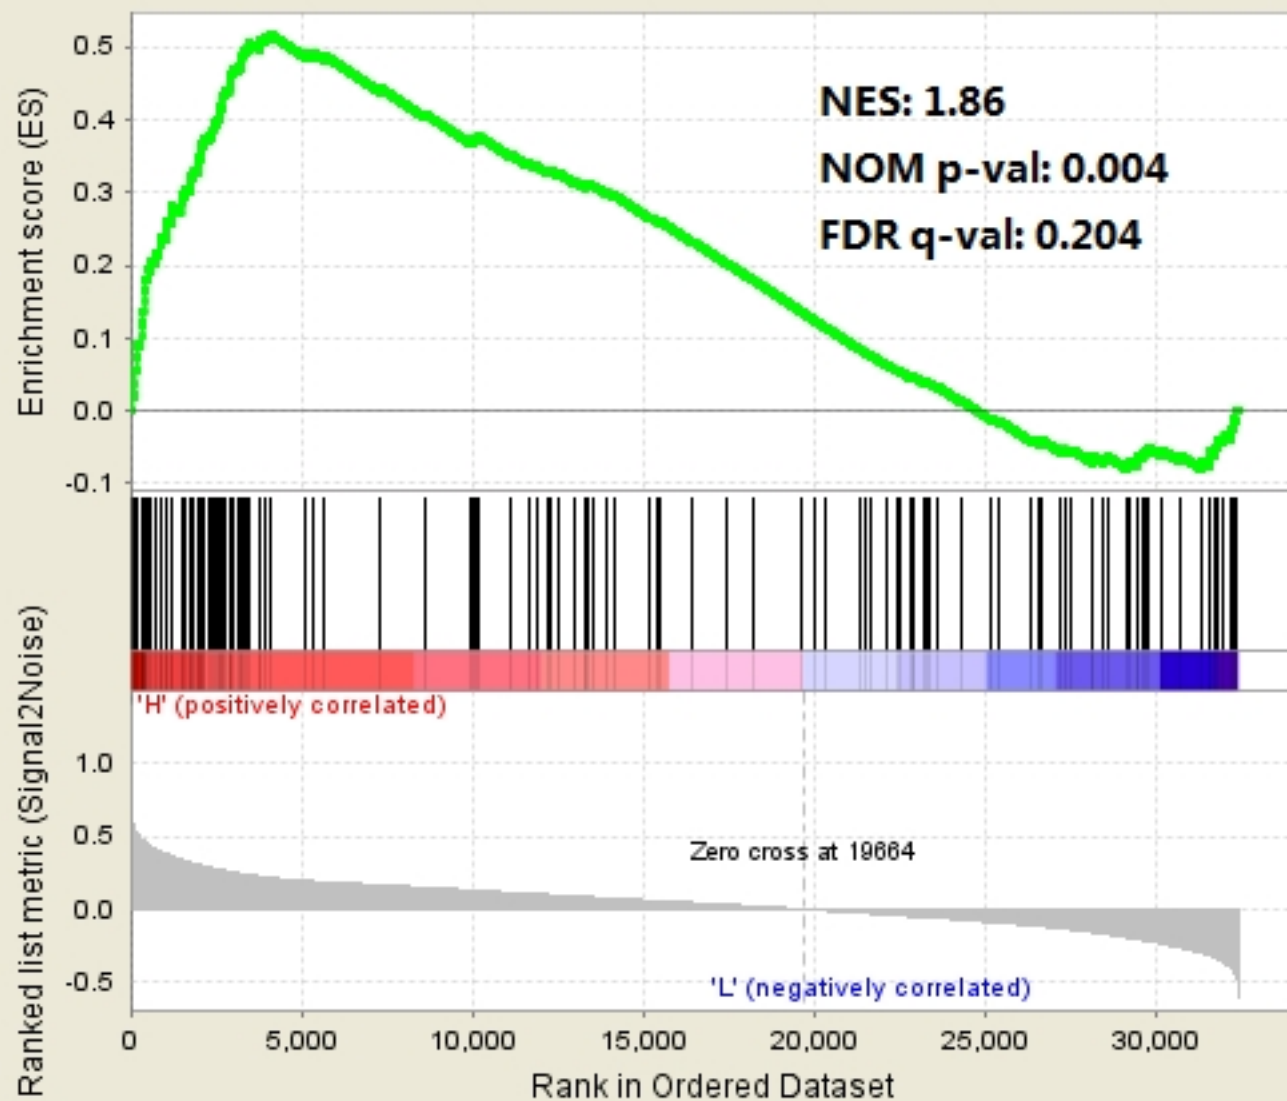

YTHDC2

— Enrichment profile — Hits — Ranking metric scores

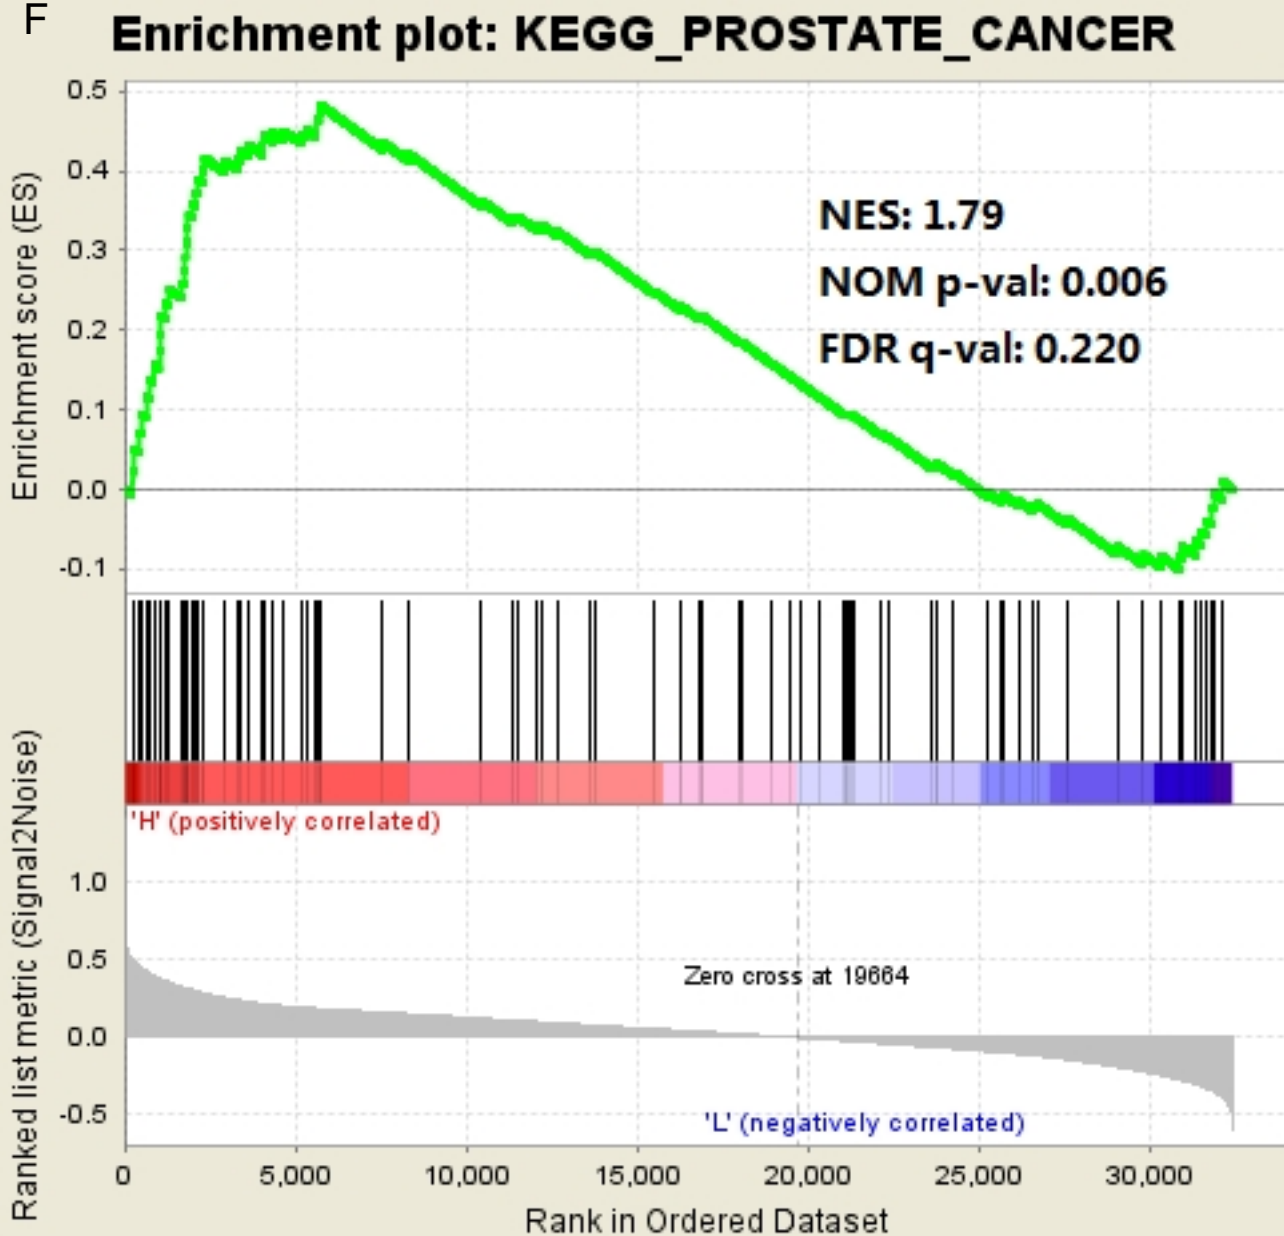

**YTHDC2**

— Enrichment profile — Hits — Ranking metric scores

# Enrichment plot: KEGG\_LONG\_TERM\_POTENTIATION

G

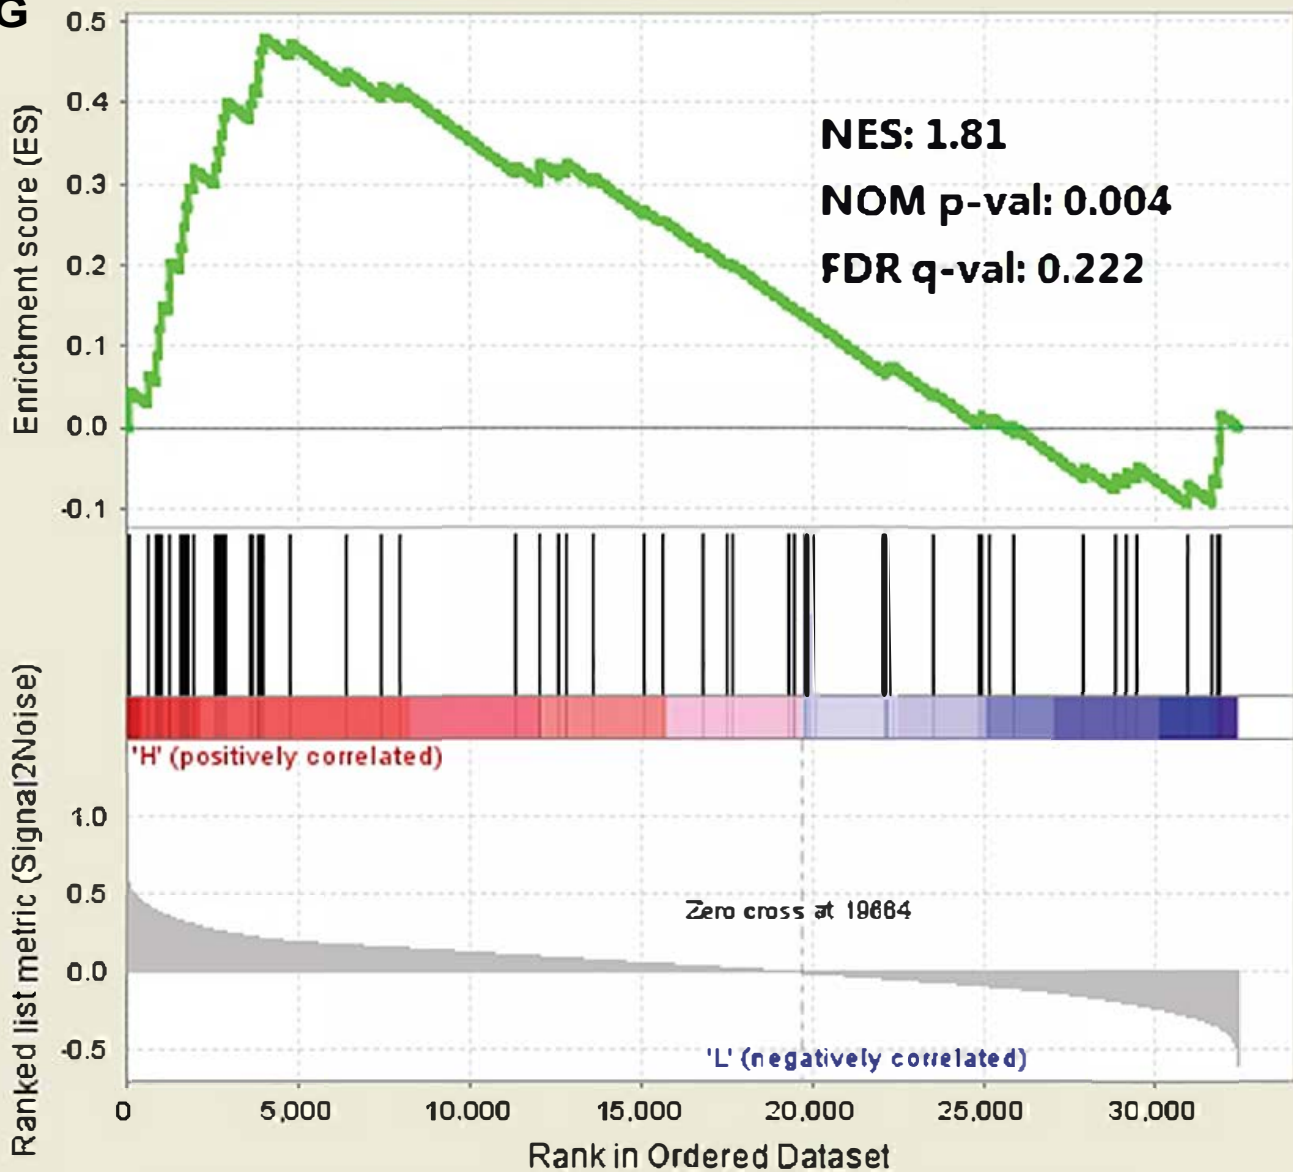

YTHDC2

Enrichment profile — Hits — Ranking metric scores
