# Supplementary material for: The YTH Domain Family of N6‐Methyladenosine “Readers” in the Diagnosis and Prognosis of Colonic Adenocarcinoma
Source: Hindawi journal article supplement (doi:10.1155/2020/9502560), 2020-01-01
Supplement: f1 [file 9502560.f1.zip]

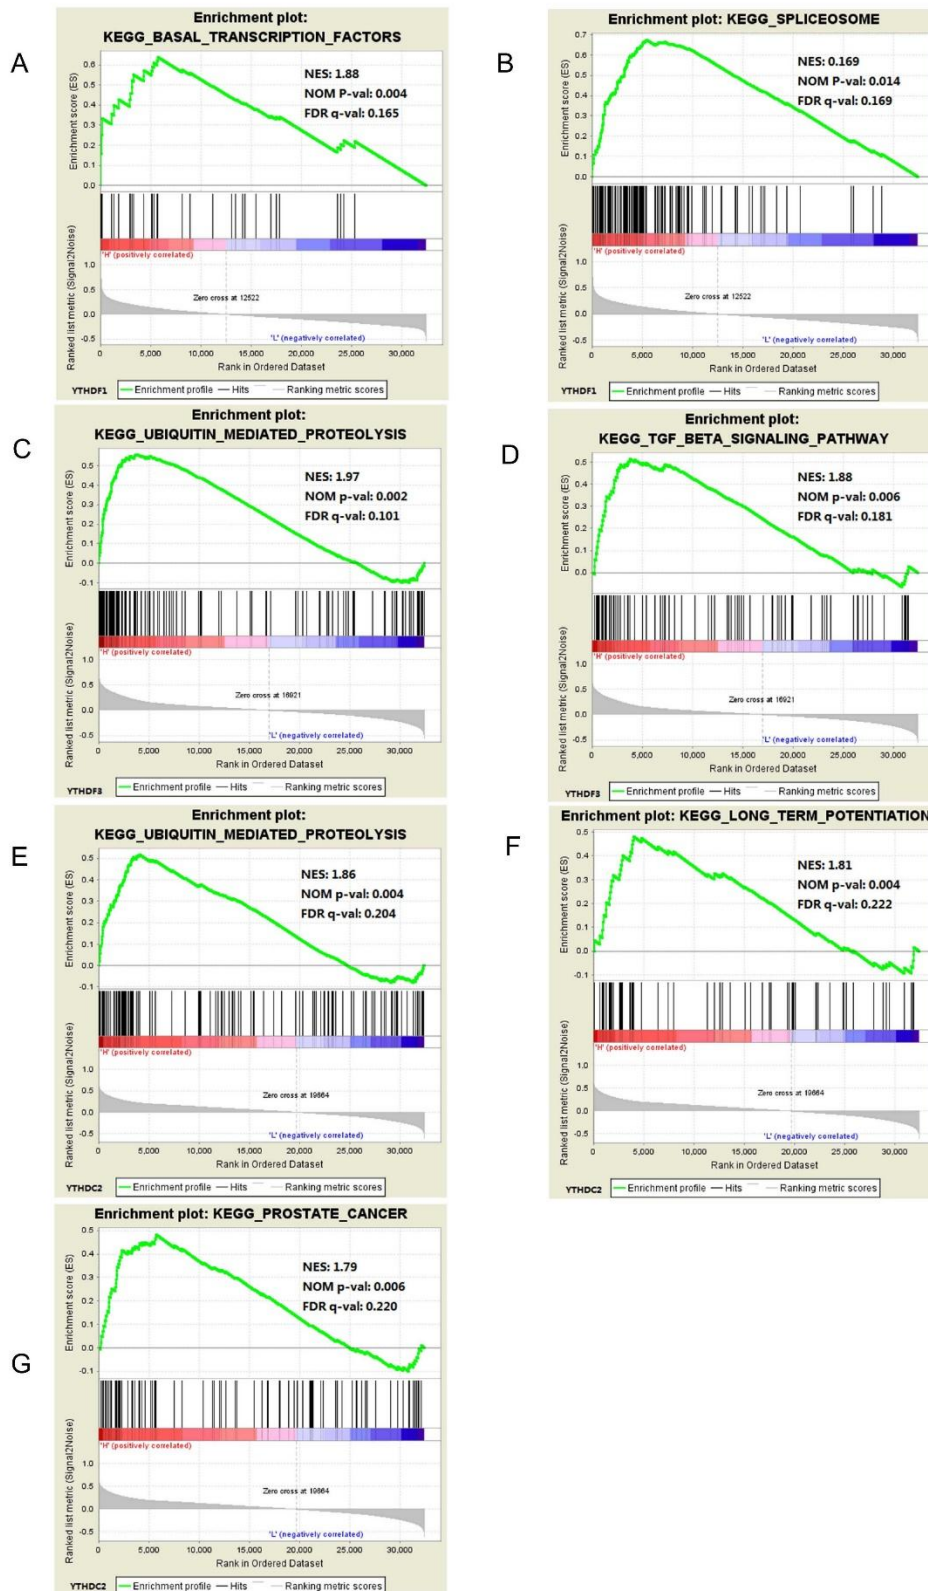

**Supplementary Figure 1.** Pathways enriched by GSEA analysis on YTHDF1,

YTHDF3, and YTHDC2.

A

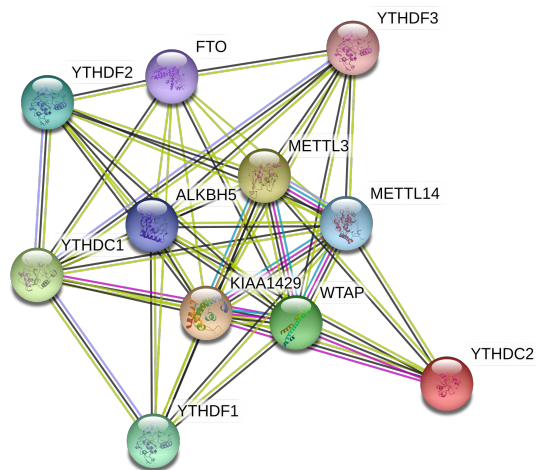

B

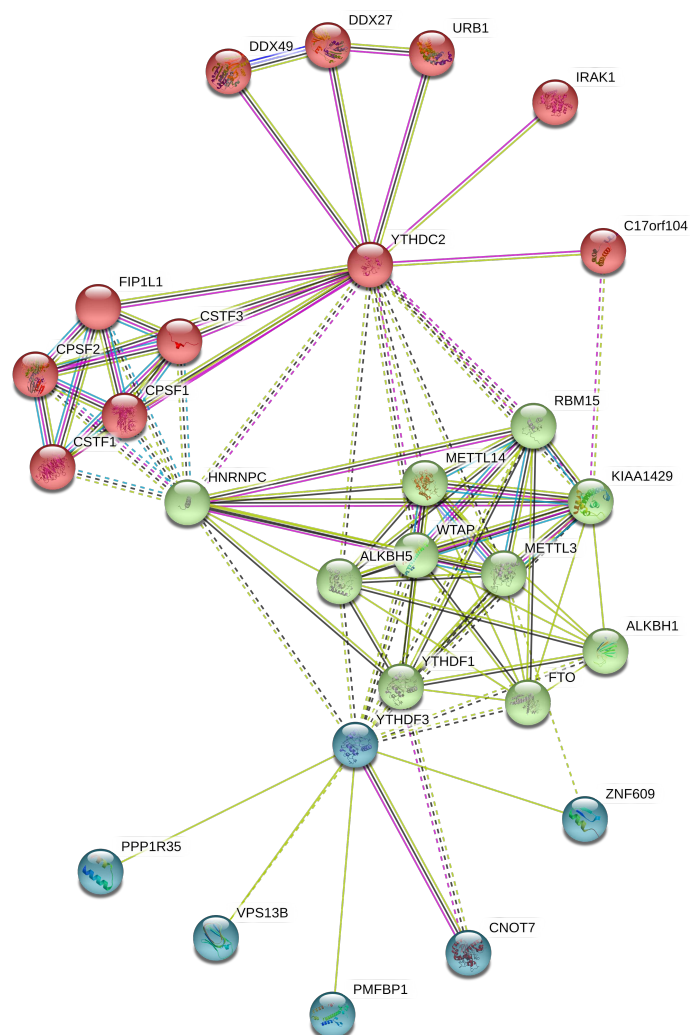

479

480 **Supplementary Figure 2.** PPI network of m<sup>6</sup>A RNA methylation regulators.
