# Supplementary figures and images for: The YTH Domain Family of N6‐Methyladenosine “Readers” in the Diagnosis and Prognosis of Colonic Adenocarcinoma
Source: Hindawi journal article supplement (doi:10.1155/2020/9502560), 2020-01-01

A

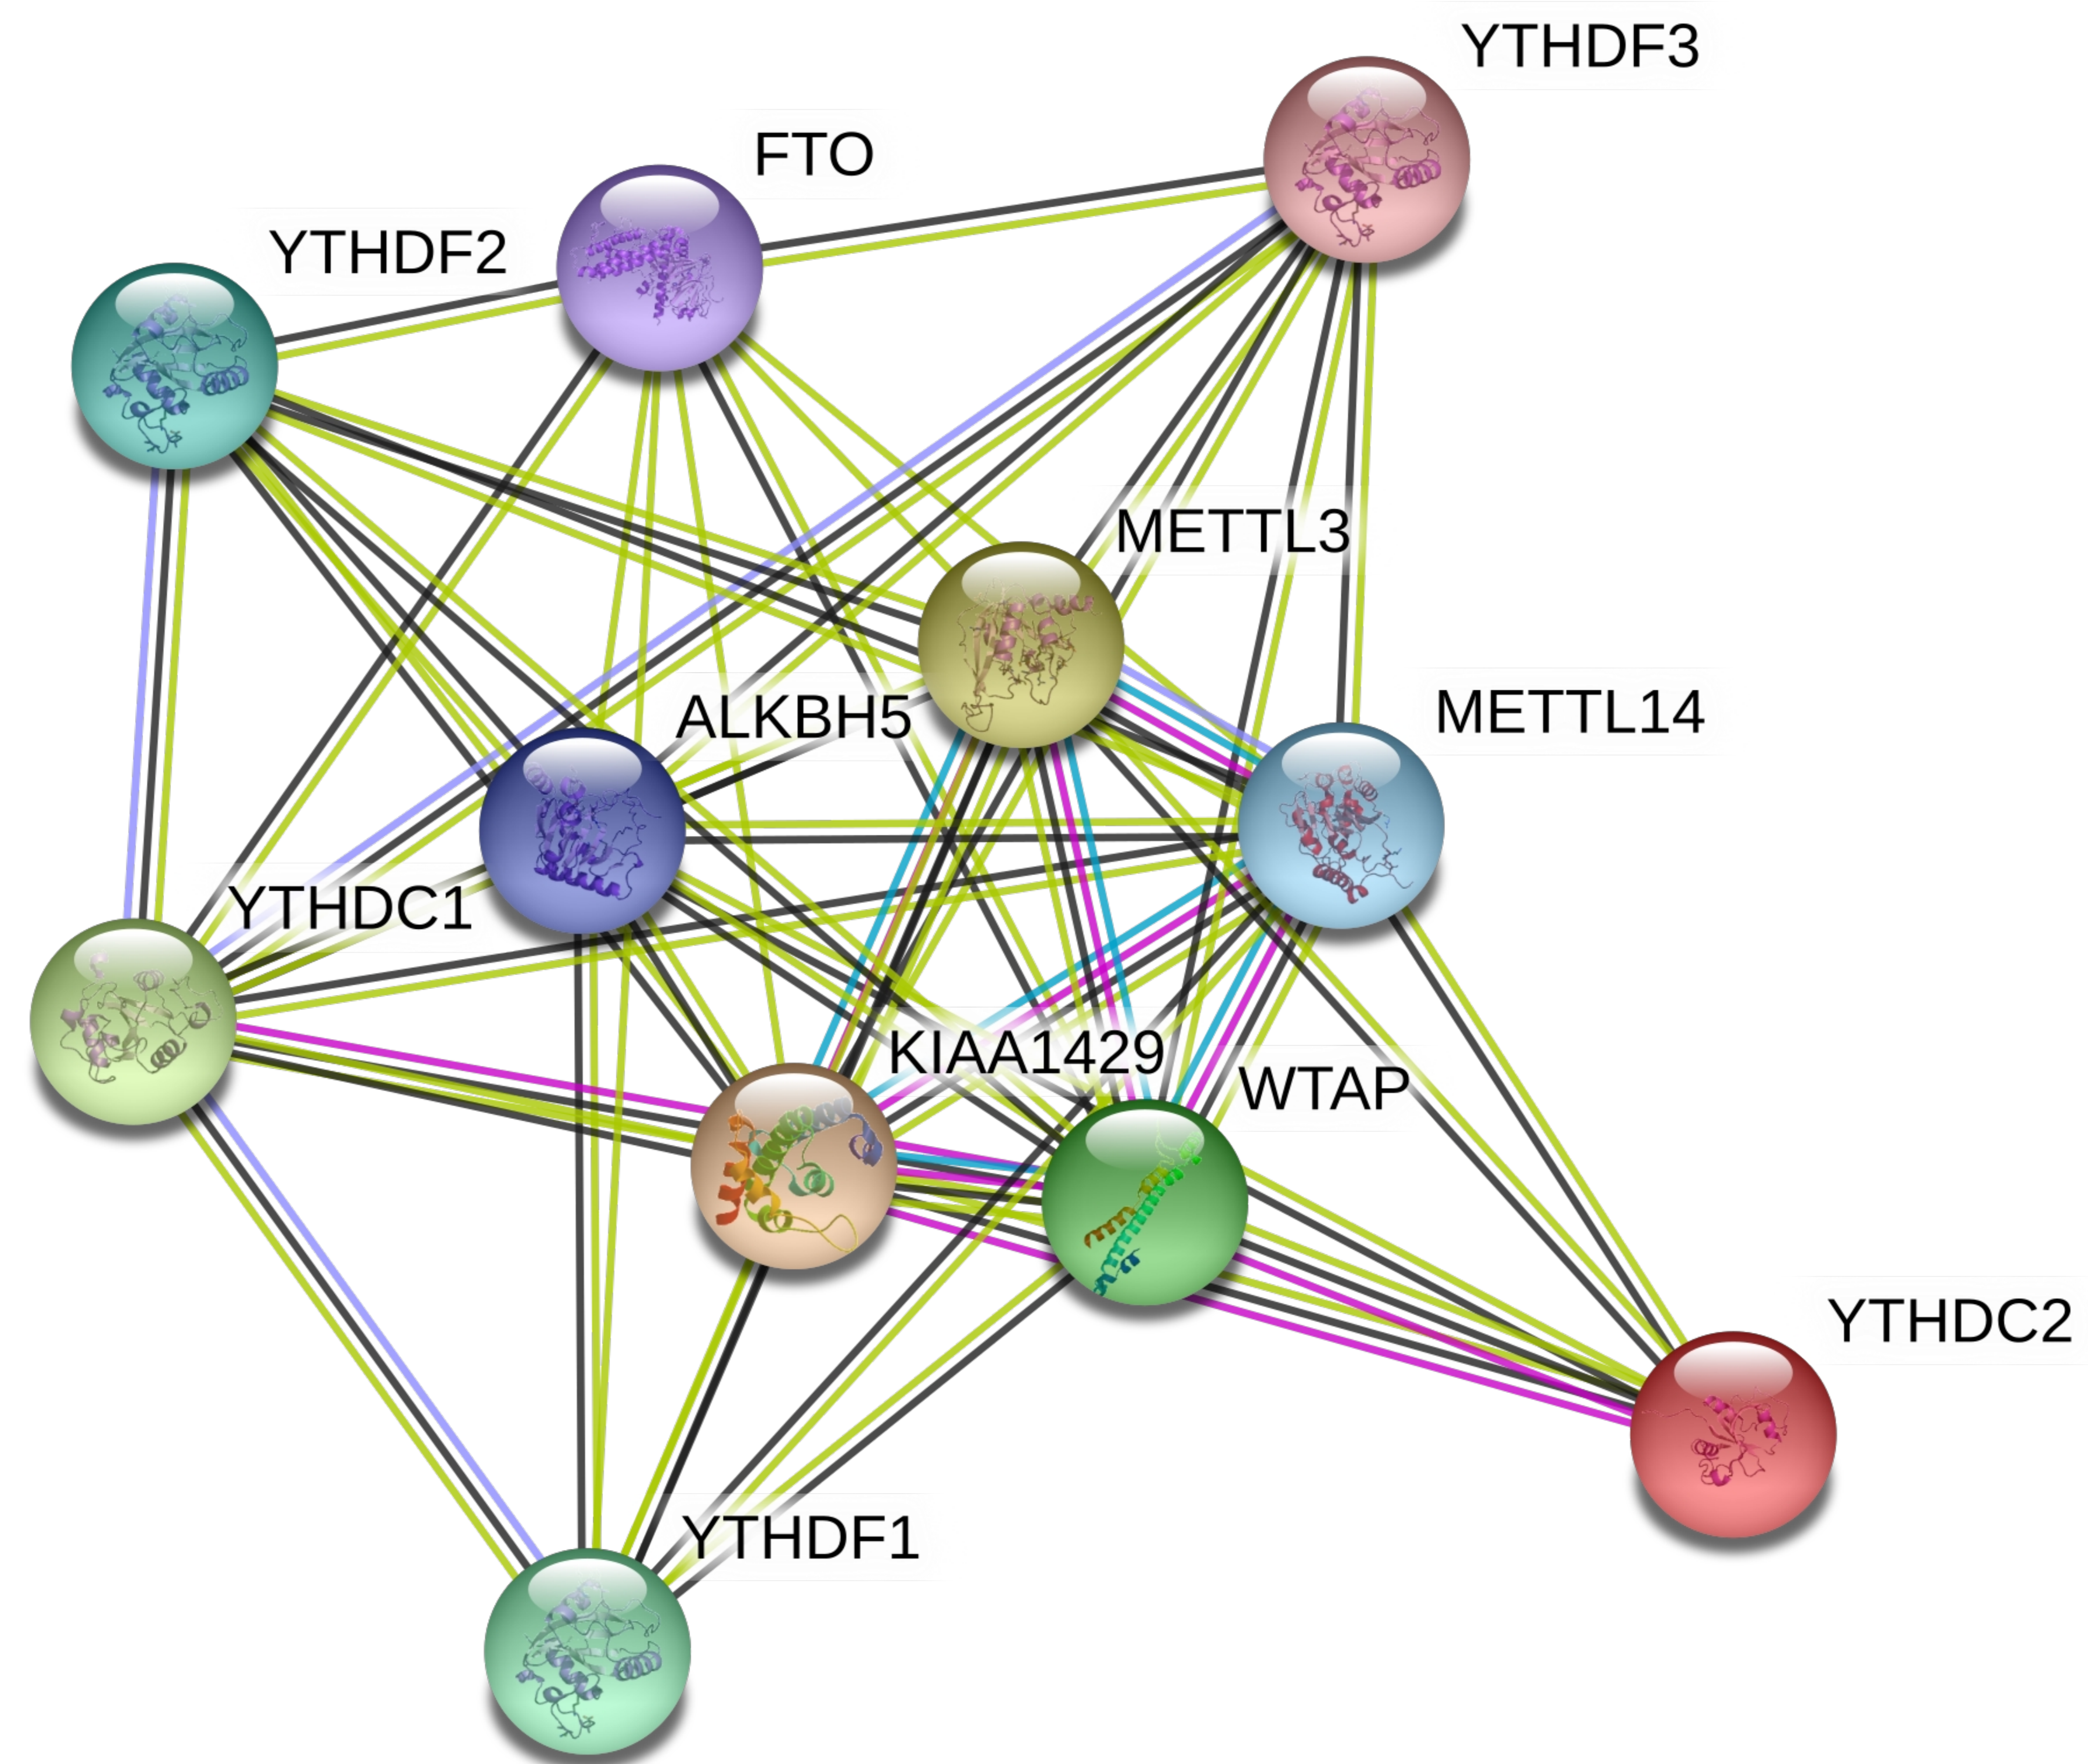

B

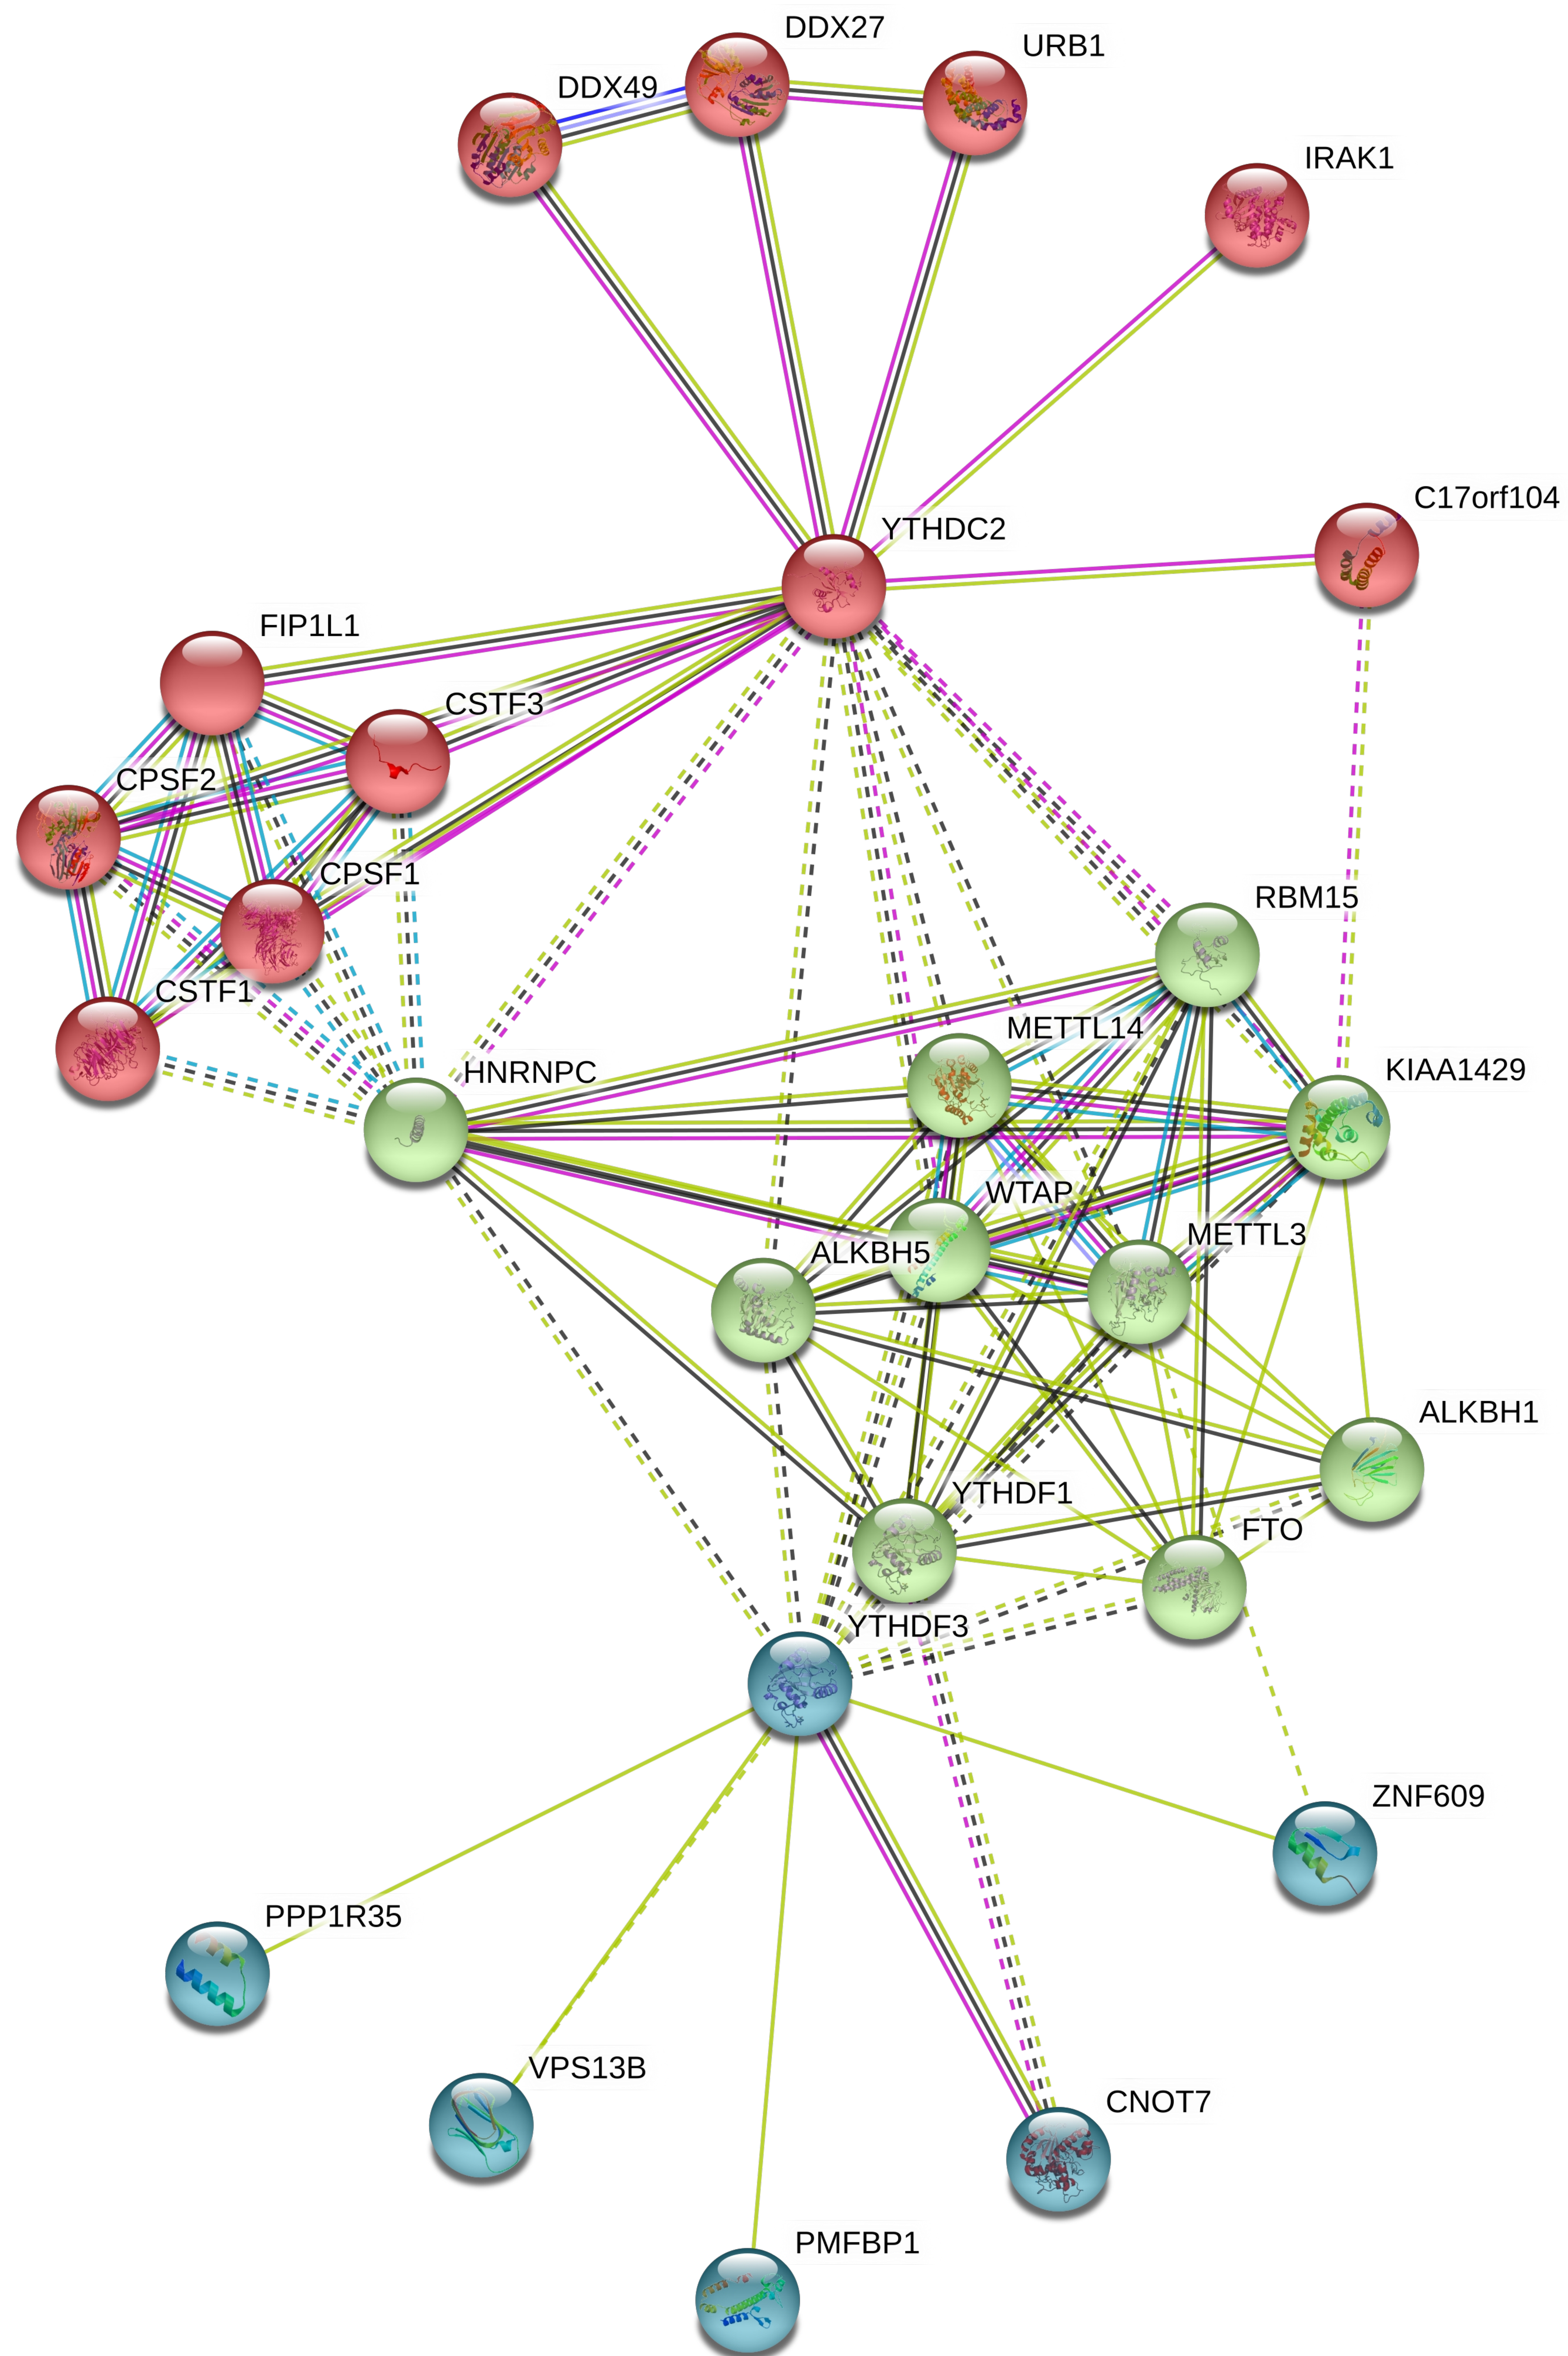

Supplement: f1 [file 9502560.f1.zip]
